# Supplementary material for: Enhanced H2 recovery by coupling the water–gas shift reaction with in situ CO2 capture and mineralization using earth abundant Ca- and Mg-silicates and hydroxides
Source: Royal Society of Chemistry journal article supplement (doi:10.1039/d4re00480a), 2024-12-03
Supplement: d4re00480a1.pdf [file d4re00480a1.pdf]

## Supplementary Information

### **Enhanced H<sub>2</sub> Recovery by Coupling the Water-Gas Shift Reaction with in-situ Carbon Capture and Mineralization using Earth Abundant Ca- and Mg-Silicates and Hydroxides**

Xun Gao,<sup>1</sup> Divya Prasad,<sup>1</sup> Mahadeo A. Mahadik,<sup>1</sup> and Greeshma  
Gadikota<sup>1,2\*</sup>

<sup>1</sup>School of Civil and Environmental Engineering, Cornell University, Ithaca, NY 14853

<sup>2</sup>Smith School of Chemical and Biological Engineering, Cornell University, Ithaca, NY 14853

\* Corresponding Author. Phone: +1 607-255-4796. E-mail: [gg464@cornell.edu](mailto:gg464@cornell.edu)

**Table S1.** Information of the Pt/Al<sub>2</sub>O<sub>3</sub> catalyst

| <i>Catalyst</i>       | <i>Pt/Al<sub>2</sub>O<sub>3</sub></i> |
|-----------------------|---------------------------------------|
| Surface area          | 163.131m <sup>2</sup> / g             |
| Pore volume           | 0.303cc/g                             |
| Average pore diameter | 6.282nm                               |

**Table S2.1.** Selected saturated pressure from steam table

| <i>t</i> [°C] | <i>T</i> [K] | <i>P<sub>s</sub></i> [bar] |
|---------------|--------------|----------------------------|
| 200           | 473.15       | 15.5467                    |
| 220           | 493.15       | 23.1929                    |
| 250           | 523.15       | 39.7594                    |
| 280           | 553.15       | 64.1646                    |
| 300           | 573.15       | 85.8771                    |

**Table S2.2.** Selected specific volume (m<sup>3</sup>/kg) for superheated steam from the steam table

| <i>t</i> [°C] | <i>5 bar</i> | <i>10bar</i> | <i>20bar</i> | <i>50bar</i> |
|---------------|--------------|--------------|--------------|--------------|
| 200           | 0.425        | 0.206        | /            | /            |
| 220           | 0.445        | 0.217        | 0.102        | /            |
| 250           | 0.474        | 0.233        | 0.110        | /            |
| 280           | 0.503        | 0.248        | 0.120        | 0.042        |
| 300           | 0.523        | 0.258        | 0.125        | 0.045        |

**Table S3.** Residual formate concentrations in the aqueous phase determined by NMR

| <i>Sorbent Type</i>              | <i>Formate Concentration (ppm)</i> |
|----------------------------------|------------------------------------|
| Blank Experiment                 | 1702.15                            |
| Mg(OH) <sub>2</sub>              | 102.46                             |
| Mg <sub>2</sub> SiO <sub>4</sub> | 147.99                             |
| Ca(OH) <sub>2</sub>              | 196.74                             |
| CaSiO <sub>3</sub>               | 131.97                             |

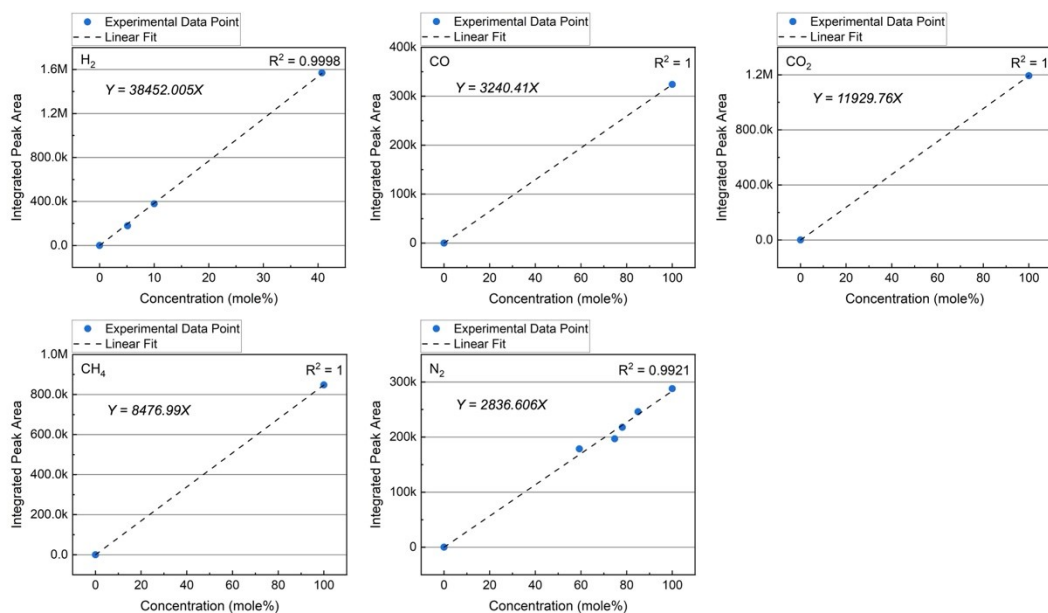

**Figure S1.** Gas chromatography (GC) calibration curves for different gas components.

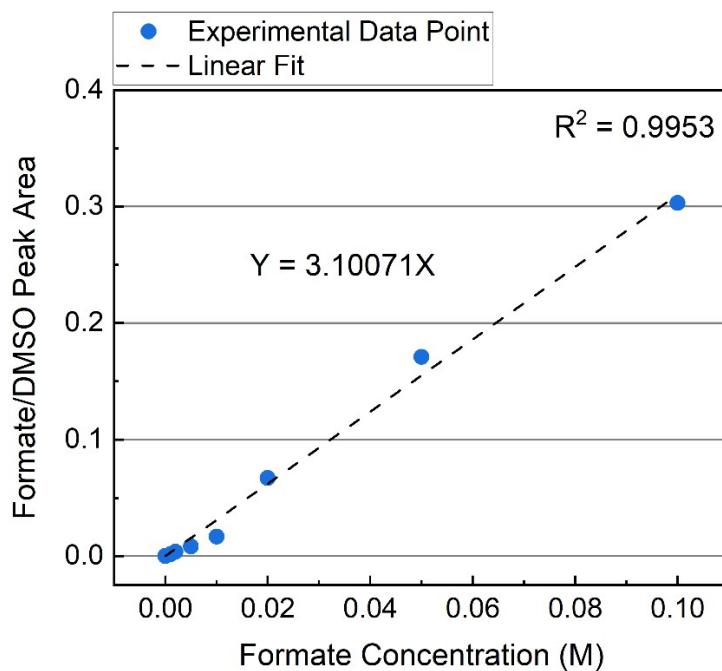

**Figure S2.** Formate concentration calibration line determined using liquid-NMR with DMSO internal standards.

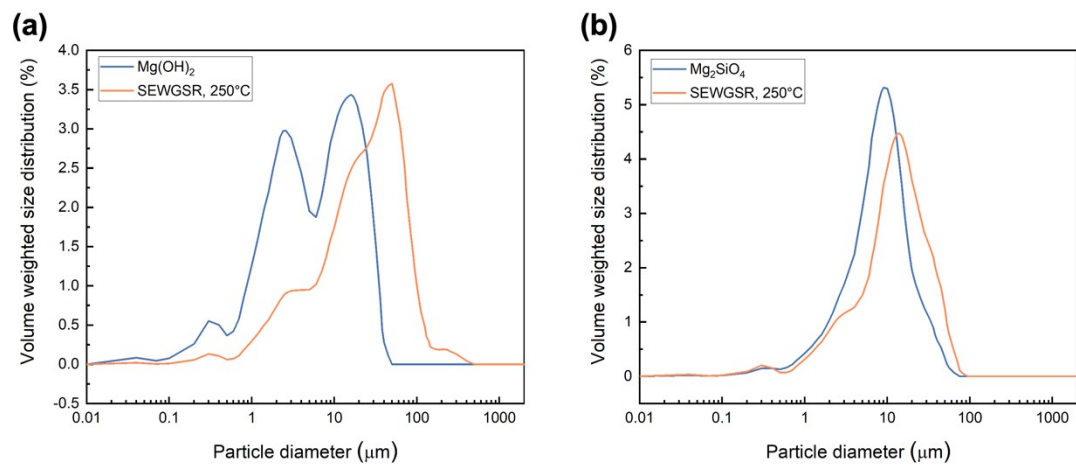

**Figure S3.** Particle size distribution of the unreacted and carbonated sorbents for (a)  $Mg(OH)_2$ ; (b)  $Mg_2SiO_4$ ;

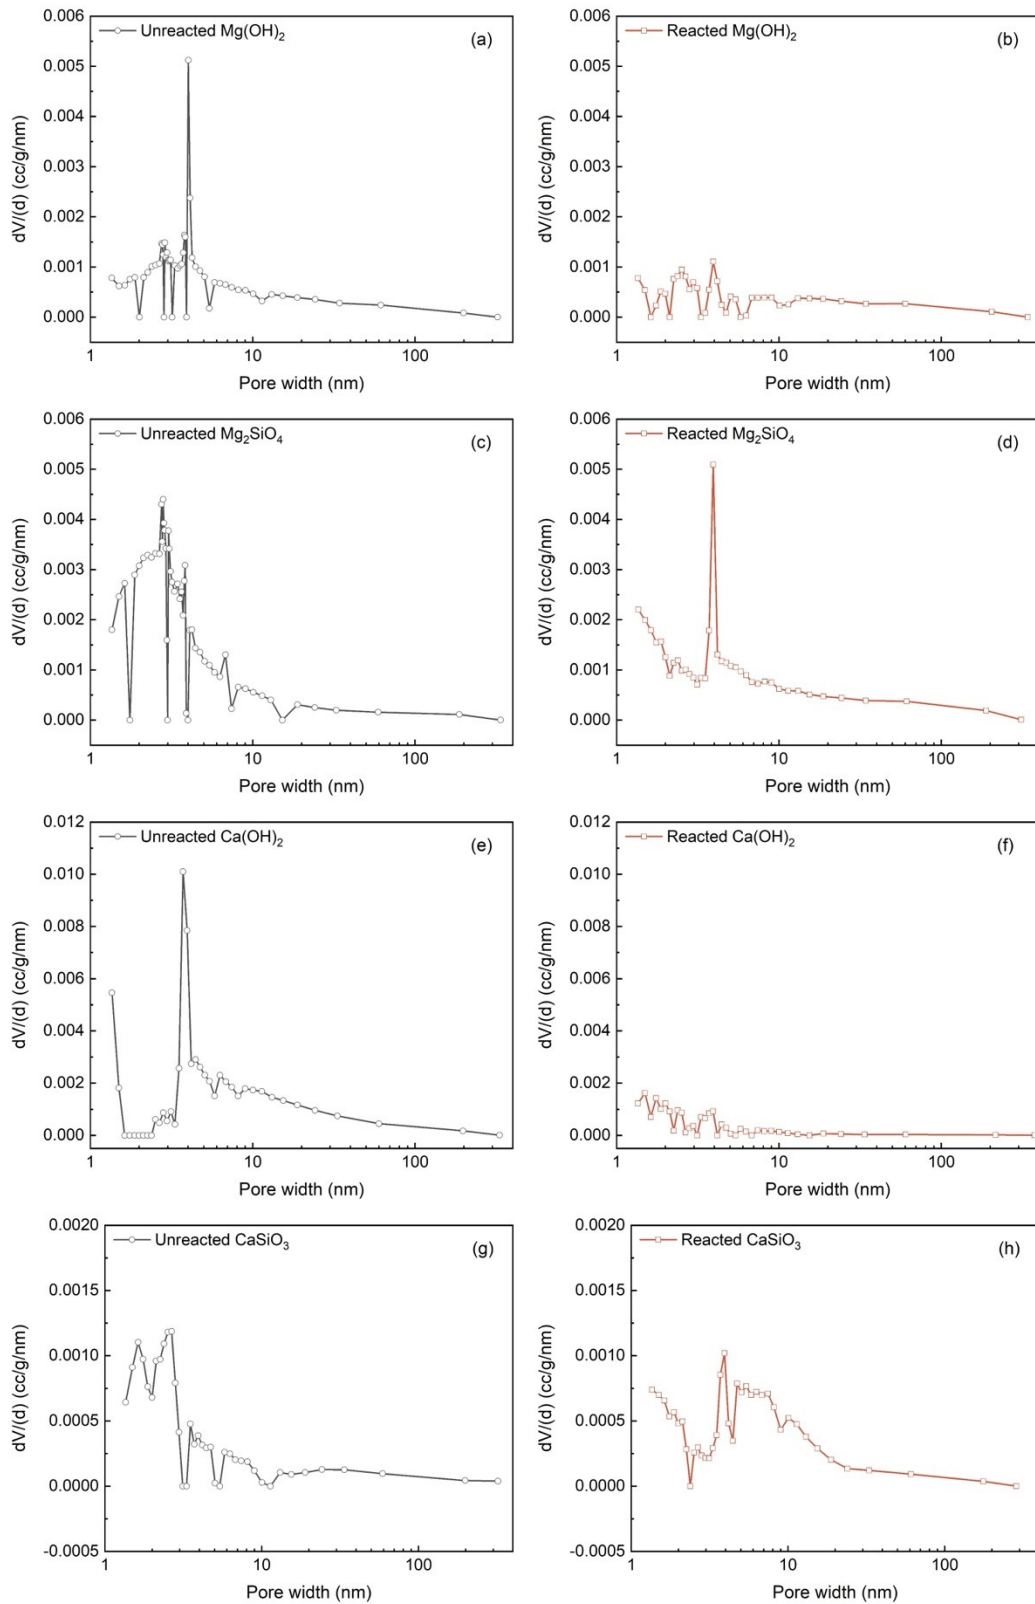

**Figure S4.** The pore size distribution of (a) unreacted  $\text{Mg}(\text{OH})_2$ ; (b) reacted  $\text{Mg}(\text{OH})_2$ ; (c) unreacted  $\text{Mg}_2\text{SiO}_4$ ; (d) reacted  $\text{Mg}_2\text{SiO}_4$ ; (e) unreacted  $\text{Ca}(\text{OH})_2$ ; (f) reacted  $\text{Ca}(\text{OH})_2$ ; (g) unreacted  $\text{CaSiO}_3$ ; (h) reacted  $\text{CaSiO}_3$  determined by the BJH model.

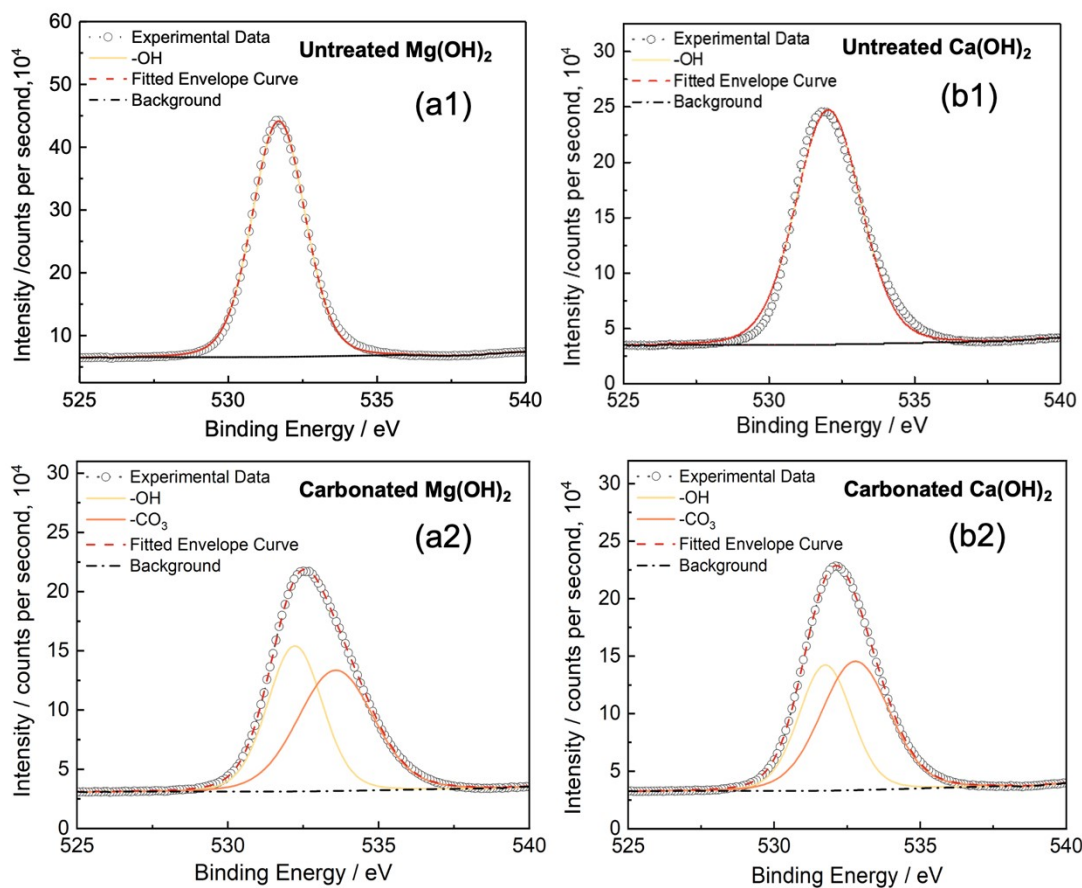

**Figure S5.** O1s XPS spectra of unreacted (a-1) Mg(OH)<sub>2</sub>, (b-1) Ca(OH)<sub>2</sub> and carbonated (a-2) Mg(OH)<sub>2</sub>; (b-2) Ca(OH)<sub>2</sub> sorbents respectively.

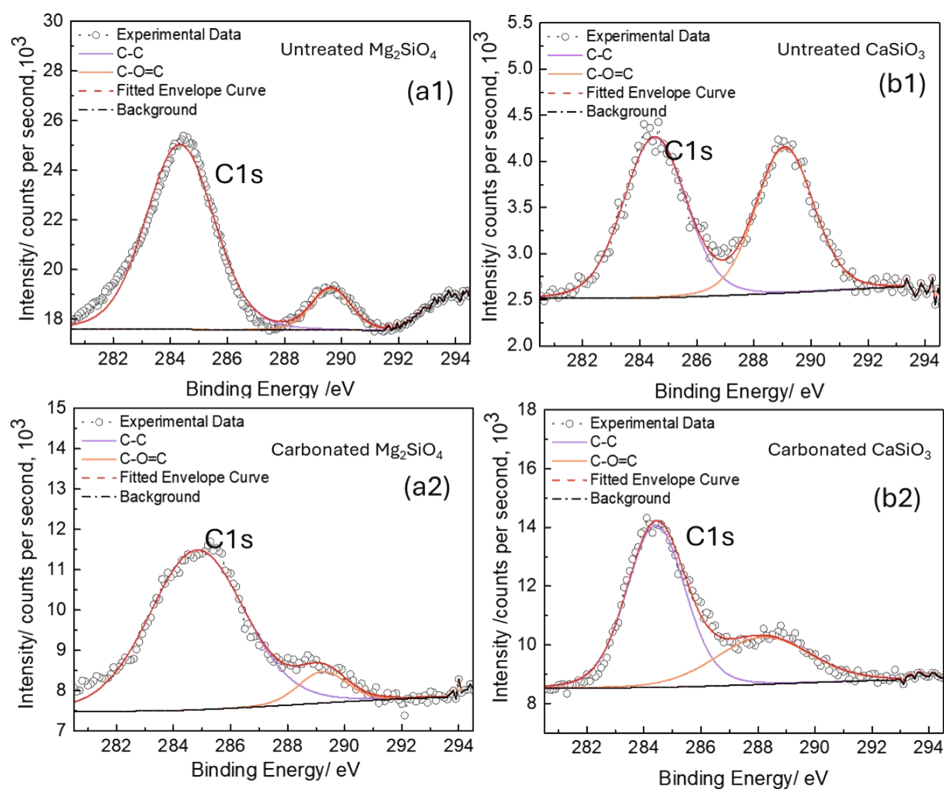

**Figure S6.** C1s XPS spectra of unreacted (a-1)  $Mg_2SiO_4$ , (b-1)  $CaSiO_3$  and carbonated (a-2)  $Mg_2SiO_4$ ; (b-2)  $CaSiO_3$  sorbents respectively.



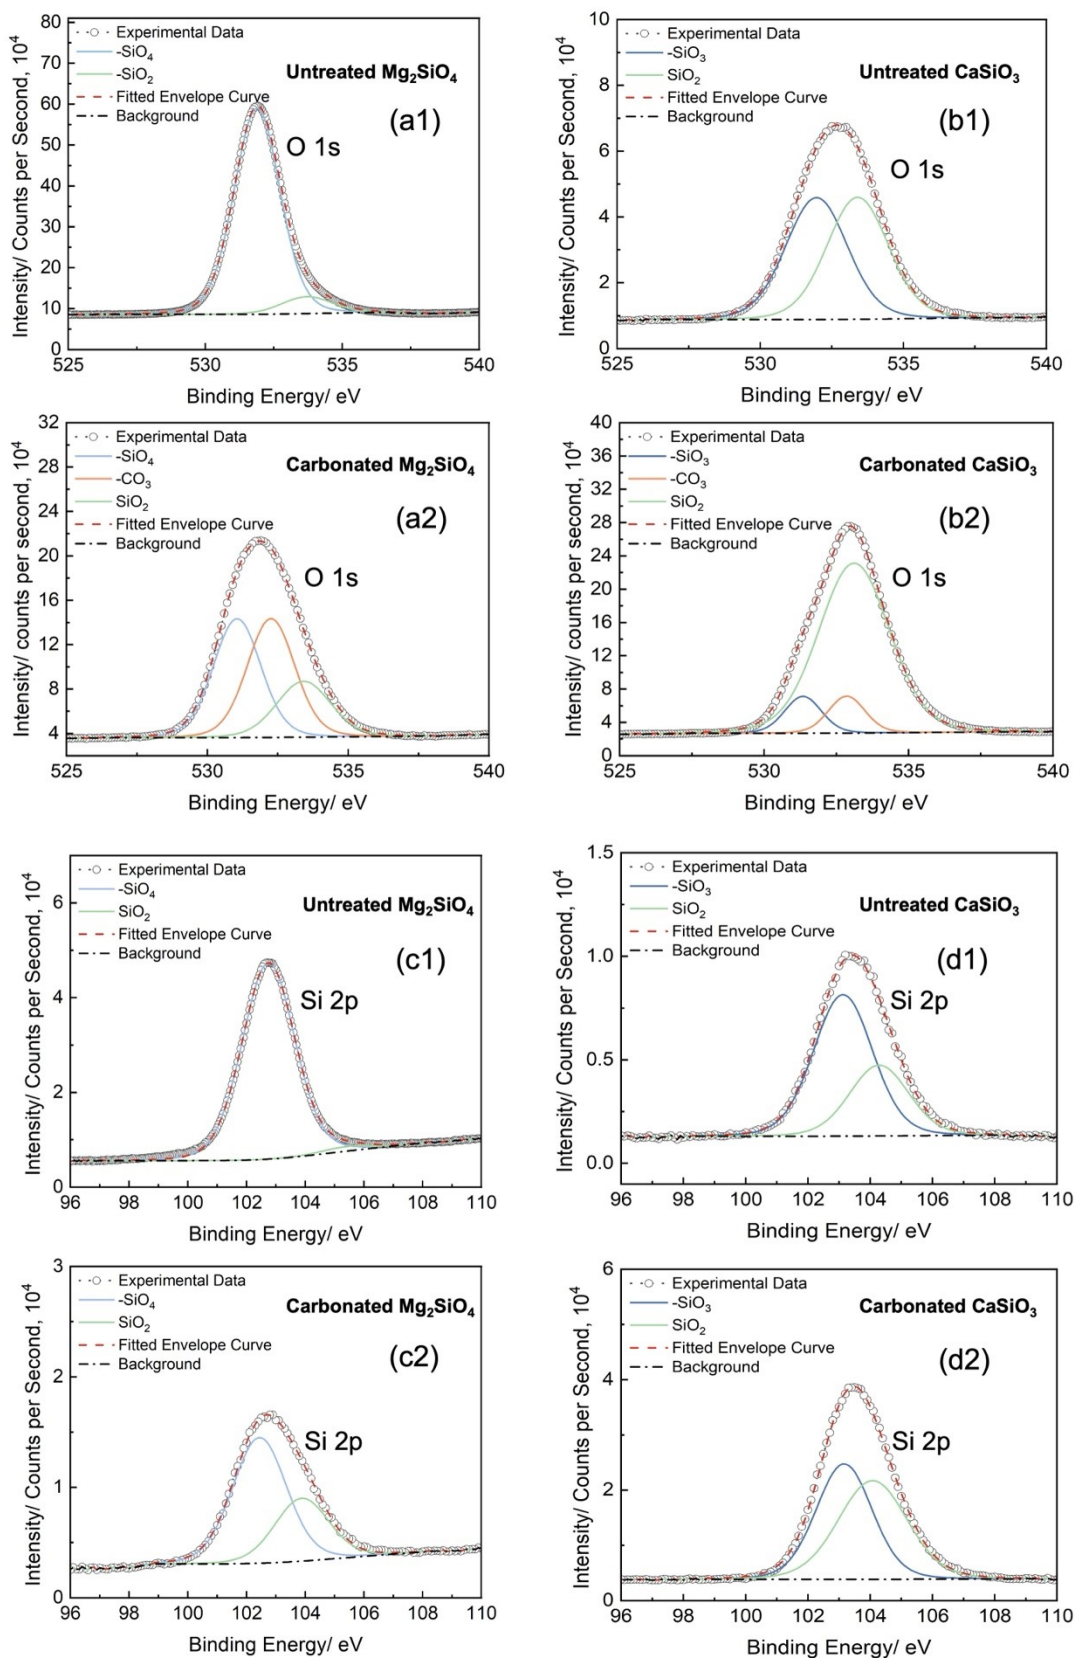

**Figure S7.** High resolution XPS spectra of ((a1-b2) O1s and (c1-d2) Si2p for unreacted and carbonated  $CaSiO_3$ ,  $Mg_2SiO_4$  sorbents, respectively

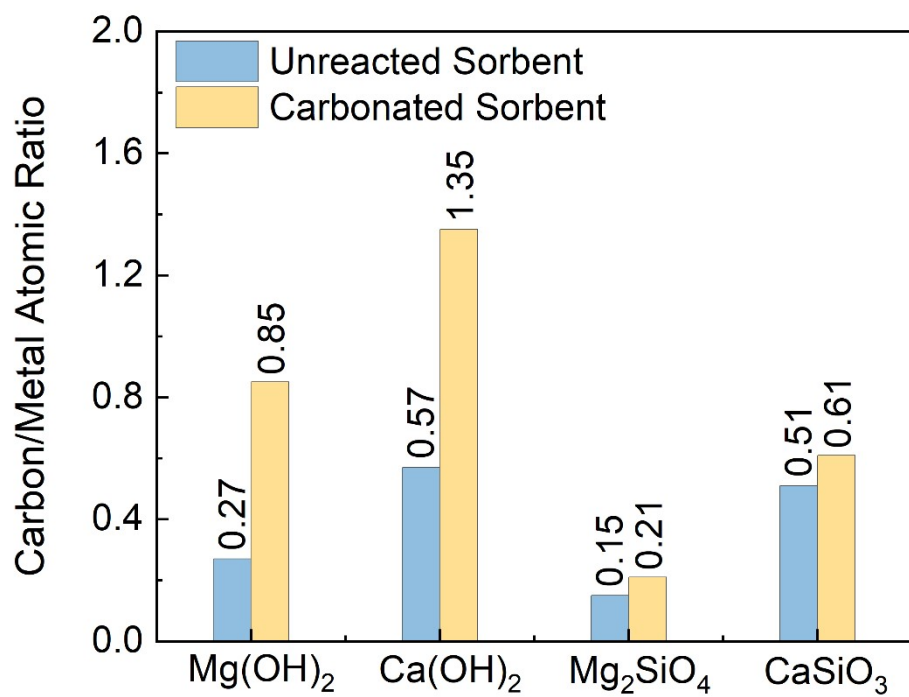

**Figure S8.** Carbon/Metal atomic ratios of the unreacted sorbents and corresponding carbonated products determined by XPS
